# Supplementary material
Source: PubMed Central journal article supplement (PMC3937454)
Supplement: NIHMS550832-supplement-1_si_001.pdf [file NIHMS550832-supplement-1_si_001.pdf]

Supporting Information for Publication

Acrolein Modification Impairs Key Functional Features of Rat Apolipoprotein E:  
Identification of Modified Sites by Mass Spectrometry

Tuyen N. Tran, Malathi G. Kosaraju, Shiori Tamamizu-Kato, Olayemi Akintunde, Ying  
Zheng, John K. Bielicki, Kent Pinkerton, Koji Uchida, Yuan Yu Lee & Vasanthi  
Narayanaswami

Figure S1

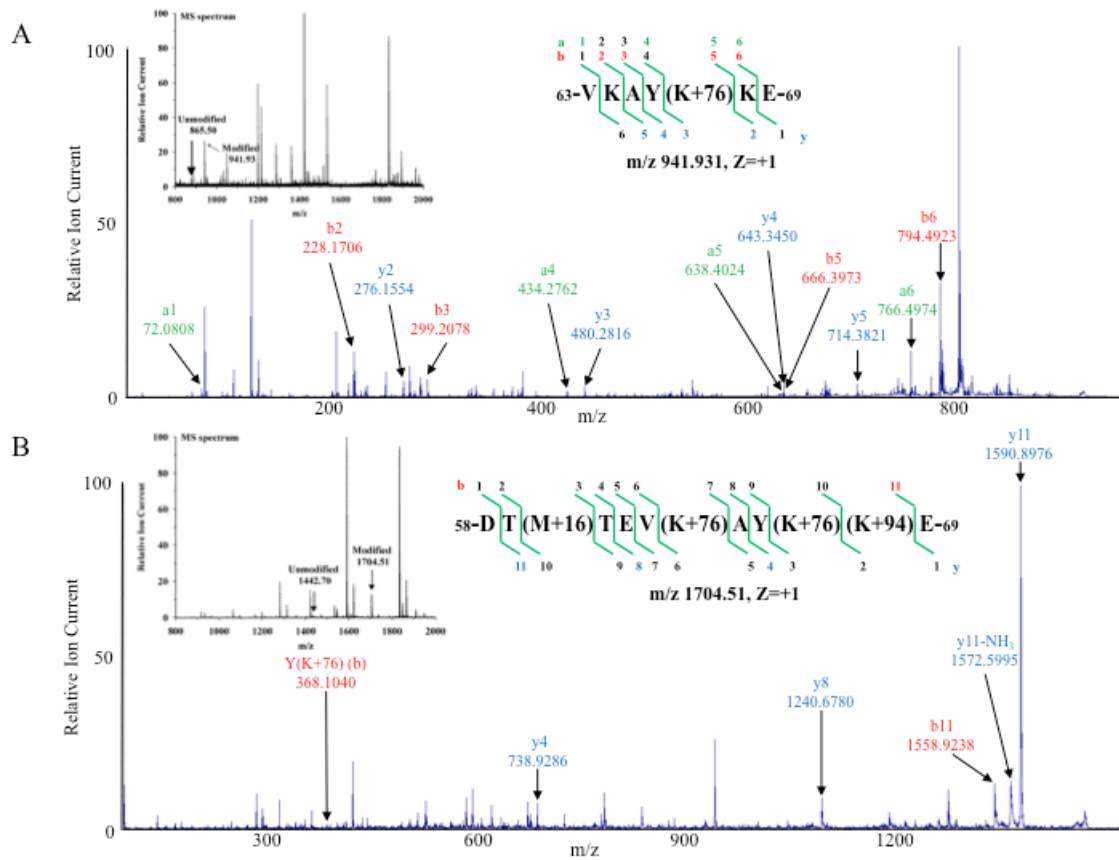

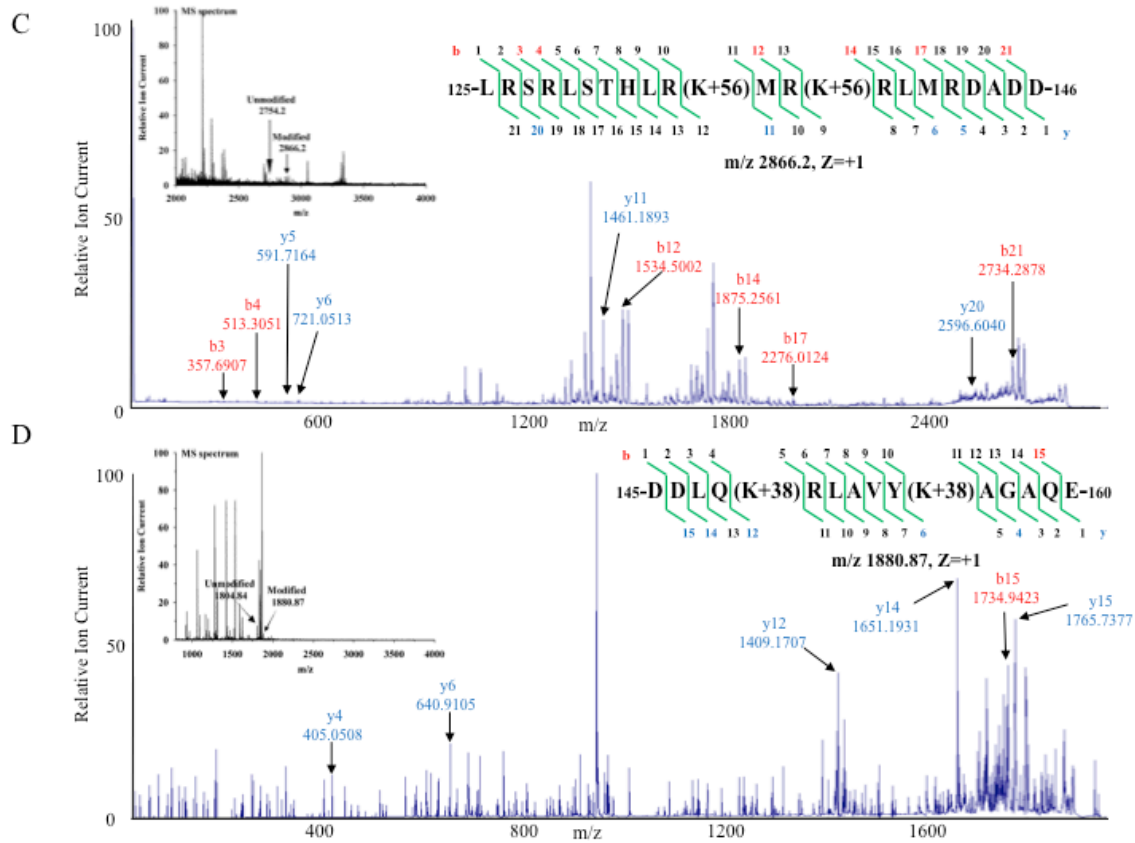

**Figure S1. MALDI TOF/TOF identification of K64, K67, K68, K135, K138, K149 and K155 in the AspN + GluC digestion of acrolein-modified apoE.** MS/MS analysis of  $[VKAYK^{67}+76KE]^+$  ( $m/z$  941.9,  $z = +1$ , **Panel A**),  $[DTM^{60}+16TEVK^{64}+76AYK^{67}+76K^{68}+94E]^+$  ( $m/z$  1704.5,  $z = +1$ , **Panel B**),  $[LRSRLSTHLRK^{135}+56MRK^{138}+56RLMRDADD]^+$  ( $m/z$  2866.2,  $z = +1$ , **Panel C**),  $[DDLQK^{149}+38RLAVYK^{155}+38AGAQE]^+$  ( $m/z$  1880.8,  $z = +1$ , **Panel D**), in acrolein-modified rat apoE. Peptide digests were analyzed with MALDI TOF/TOF. The *Inset* in the Panels shows the mass spectrum for each parent ion for unmodified and acrolein-modified apoE peptides.
